# Supplementary material for: Volunteering and overseas placements in the NHS: a survey of current activity
Source: PubMed Central journal article supplement — BMJ Open. 2016 Oct 19;6(10):e012160. doi: 10.1136/bmjopen-2016-012160 (PMC5073548; doi:10.1136/bmjopen-2016-012160), 2016-10-19
Supplement: bmjopen-2016-012160supp.pdf [file bmjopen-2016-012160supp.pdf]

# Measuring the Outcomes of Volunteering for Education

## 1) Staff Group

- Allied health professionals
- Healthcare scientists
- Medical and dental
- NHS Infrastructure
- Scientific and technical
- Qualified Ambulance staff
- Nursing, midwifery and health vis
- Support to clinical staff

## 2) Career stage

- Pre-University
- Student
- Early career
- Mid career
- Experienced
- Post retirement

## 3) Age

- Below 25
- 26-30
- 31-40
- 42-50
- 51-60
- 61-70
- 71 or over

## 4) Gender

- Male
- Female
- Other

## 5) Nationality

- British
- European
- Non-EU National – High income Country
- Non-EU National – Low income Country
- Other

## 6) Have you had **any periods in another country, either as an employee or volunteer?**

- Yes
- No

## Placement 1

What kind of placement was it?

- Healthcare
- Other

What stage of your career were you at?

- Pre-degree
- Degree / training
- Early career
- Mid career
- Senior
- Retirement

Economic status of country:

- High income
- Mid income
- Low income

## Placement 2

What kind of placement was it?

- Healthcare
- Other

Economic status of country:

- High income
- Mid income
- Low income

What stage of your career were you at?

- Pre-degree
- Degree / training
- Early career
- Mid career
- Senior
- Retirement

## Placement 3

What kind of placement was it?

- Healthcare
- Other

Economic status of country:

- High income
- Mid income
- Low income

What stage of your career were you at?

- Pre-degree
- Degree / training
- Early career
- Mid career
- Senior
- Retirement

**7) Would you be happy to be interviewed about your experience as a volunteer abroad?**

Name

Email / phone number
